# Supplementary material
Source: PubMed Central journal article supplement (PMC7383377)
Supplement: supp_RA120.014081_160438_2_supp_546070_qbq60d.pdf [file supp_RA120.014081_160438_2_supp_546070_qbq60d.pdf]

## *Supporting Information*

### **Contributions of the Heme Coordinating Ligands of the *Pseudomonas aeruginosa* Outer Membrane Receptor HasR to Extracellular Heme Sensing and Transport**

Alecia T. Dent and Angela Wilks\*

Department of Pharmaceutical Sciences, School of Pharmacy, University of Maryland, Baltimore, MD 21201.

#### **Table of Contents**

**Table S1.** Strains and plasmids used in this study.

**Table S2.** Oligonucleotide primers and probes used in this study.

**Figure S1.** Relative HasR and HasAp protein levels for the *hasR* allelic strains in iron-deplete conditions.

**Figure S2.** Relative *phuR* mRNA and protein levels for the *hasR* allelic strains in heme supplemented conditions.

**Figure S3.** Relative *phuR* mRNA and protein levels for the *hasR* allelic strains in holo-HasAp supplemented conditions.

**Table S1.** Strains and plasmids used in this study.

| Strains                           | Relevant genotype or description                                                                                                                                                                          | Source of Reference |
|-----------------------------------|-----------------------------------------------------------------------------------------------------------------------------------------------------------------------------------------------------------|---------------------|
| <i>E. coli</i>                    |                                                                                                                                                                                                           |                     |
| S17-1- $\lambda$ -pir             | pro thi hsdR_ Tpr Smr; chromosome::RP4-2 Tc::Mu-Km::Tn7/ $\lambda$ pir                                                                                                                                    | (1)                 |
| BL21 (DE3)                        | F <sup>-</sup> ompT hsdSB (rB <sup>-</sup> mB <sup>-</sup> ) gal dcm (DE3)                                                                                                                                | Stratagene          |
| OneShot Top10                     | F- <i>mcrA</i> $\Delta$ ( <i>mrr-hsdRMS-mcrBC</i> ) $\Phi$ 80 <i>lacZ</i> $\Delta$ M15 $\Delta$ <i>lacX74 recA1 araD139</i> $\Delta$ ( <i>araleu</i> )7697 <i>galU galK rpsL</i> (StrR) <i>endA1 nupG</i> | Invitrogen          |
| <i>P. aeruginosa</i>              |                                                                                                                                                                                                           |                     |
| PAO1                              | Wild type                                                                                                                                                                                                 | (2)                 |
| H221R                             | Chromosomal in frame <i>hasR</i> mutation in PAO1                                                                                                                                                         | This study          |
| H624A                             | Chromosomal in frame <i>hasR</i> mutation in PAO1                                                                                                                                                         | This study          |
| I694G                             | Chromosomal in frame <i>hasR</i> mutation in PAO1                                                                                                                                                         | This study          |
| H624Y                             | Chromosomal in frame <i>hasR</i> mutation in PAO1                                                                                                                                                         | This study          |
| <b>Plasmids</b>                   |                                                                                                                                                                                                           |                     |
| pCR 2.1-TOPO TA                   | Amp <sup>R</sup> , KanR; Subcloning vector                                                                                                                                                                | Invitrogen          |
| pEX18Tc                           | Tc <sup>R</sup> ; allelic replacement vector                                                                                                                                                              | (3)                 |
| pEX18Tc-H221R                     | Tc <sup>R</sup> ; <i>hasR</i> mutant allele cloned into pEX18Tc plasmid by Gibson assembly                                                                                                                | This study          |
| pEX18Tc-H624A                     | Tc <sup>R</sup> ; <i>hasR</i> mutant allele cloned into pEX18Tc plasmid by Gibson assembly                                                                                                                | This study          |
| pEX18Tc-I694G                     | Tc <sup>R</sup> ; <i>hasR</i> mutant allele cloned into pEX18Tc plasmid by Gibson assembly                                                                                                                | This study          |
| pEX18Tc-H624Y                     | Tc <sup>R</sup> ; <i>hasR</i> mutant allele cloned into pEX18Tc plasmid by Gibson assembly                                                                                                                | This study          |
| cytochrome b <sub>5</sub> -PET11a | Expression vector                                                                                                                                                                                         | (4)                 |

**Table S2.** Oligonucleotide primers and probes used in this study.

| Name                                   | Sequence                                                   | Reference  |
|----------------------------------------|------------------------------------------------------------|------------|
| <b>RT-qPCR Primers and probes</b>      |                                                            |            |
| qPCR- <i>hasR</i> probe                | 5'-/FAM/CTG GCC TAC GGG CAG CTC TCC<br>TA/3BHQ_1/-3'       |            |
| qPCR- <i>hasR</i> F                    | 5'-CGT GGC GTC GAG TAC CAG-3'                              |            |
| qPCR- <i>hasR</i> R                    | 5'-GGT CTT CGA ACA GAA GTC GTT G-3'                        |            |
| qPCR- <i>hasAp</i> probe               | 5'-/56-FAM/TCG ACC CGA GCC TGT/3BHQ_1/-3'                  |            |
| qPCR- <i>hasAp</i> F                   | 5'-ATC GAC GCG CTG CTG AA-3'                               |            |
| qPCR- <i>hasAp</i> R                   | 5'-TGG TCG AAG GTG GAG TTG ATC-3'                          |            |
| qPCR- <i>phuR</i> probe                | 5'-/56-FAM/CTA CGC GCA GAC CCA CCG CAA<br>C/3BHQ_1/-3'     |            |
| qPCR- <i>phuR</i> F                    | 5'-TGA CCA ACG ACT TCT TCA GC-3'                           |            |
| qPCR- <i>phuR</i> R                    | 5'-CTT TAC GAT GTC CGG ATC GAC-3'                          |            |
| qPCR-PA16S F                           | 5'-GGT GGT TCA GCA AGT TGG ATG TG-3'                       | (5)        |
| qPCR-PA16S R                           | 5'-CCA GGT GGT CGC CTT CGC-3'                              | (5)        |
| <b>Allelic Exchange</b>                |                                                            |            |
| HasR upstream                          | 5'-GCG GTA CCT CGC TTC CGA GAG C-3'                        | This study |
| HasR downstream                        | 5'-GCT CTA GAC AAC GAG TGG TGA ATG-3'                      | This study |
| <b>Quickchange mutagenesis primers</b> |                                                            |            |
| H221R-F                                | 5'-GAA CTA CCA GCA GAG CGG CCG CCA GCA<br>GCG CAA C-3'     | This study |
| H221R-R                                | 5'-GTT GCG CTG CTG GCG GCC GCT CTG CTG GTA<br>GTT C-3'     | This study |
| H624A-F                                | 5'-GAT CAC CGG CCG CCC CGC CGG CGG CGG<br>CGC GGA AAA C-3' | This study |
| H624A-R                                | 5'-GTT TTC CGC GCC GCC GCC GGC GGG GCG GCC<br>GGT GAT C-3' | This study |
| I694G-F                                | 5'-GTA CGG CAT GGC CGG GGG CGG CAA CAG<br>CGC CTA C-3'     | This study |
| I694G-R                                | 5'-GTA GGC GCT GTT GCC GCC CCC GGC CAT GCC<br>GTA C-3'     | This study |
| H624Y-F                                | 5'-GAT CAC CGG CCG CCC CTA CGG CGG CGG<br>CGC GGA AAA C-3' | This study |
| H624Y-R                                | 5'-GTT TTC CGC GCC GCC GCC GTA GGG GCG GCC<br>GGT GAT C-3' | This study |

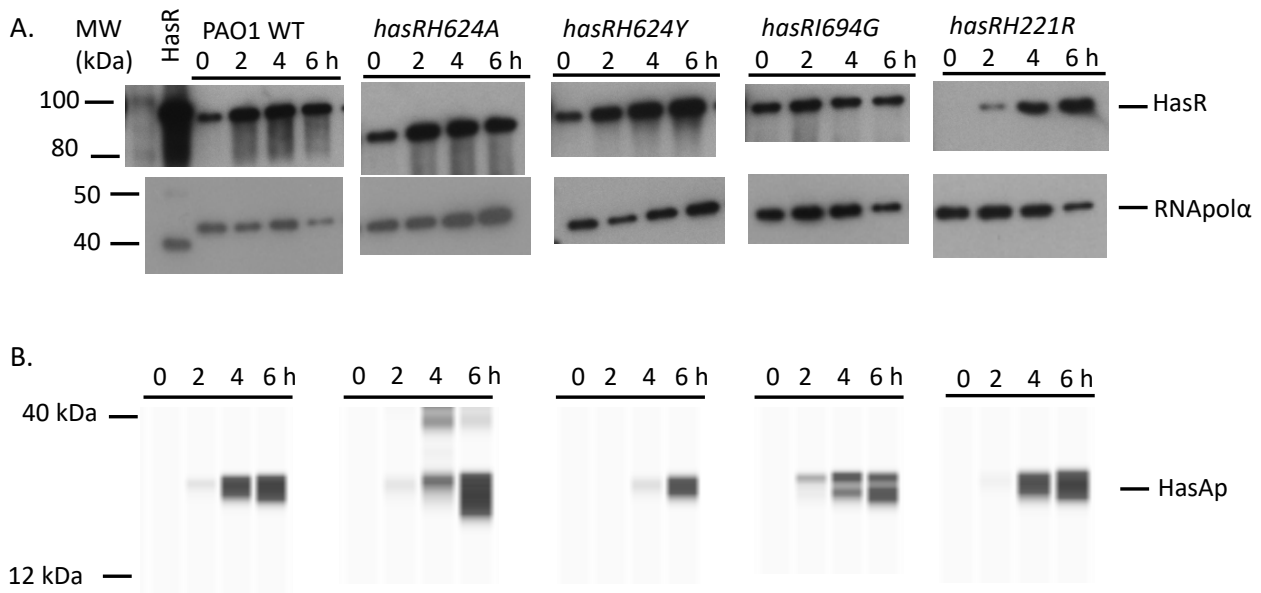

**Figure S1. Relative HasR and HasAp protein levels for the *hasR* allelic strains in iron-deplete conditions.** *A.* Representative Western blot of HasR for the WT and *hasR* allelic strains following growth in M9 minimal media. Total protein (5  $\mu$ g) was loaded in each well. The RNA polymerase  $\alpha$  subunit was used as a loading control. The RNA polymerase  $\alpha$  panel for PAO1 WT and *hasRI694G* strain are the same as shown in Fig 4C as they represent the same set of biological samples from replicates collected in iron-deplete conditions. *B.* Representative Wes digital images of HasAp for the PAO1 WT and *hasR* allelic strains following growth in M9 minimal media. 4  $\mu$ l extracellular supernatant was loaded and run on the automated Wes as described in the Experimental Procedures.

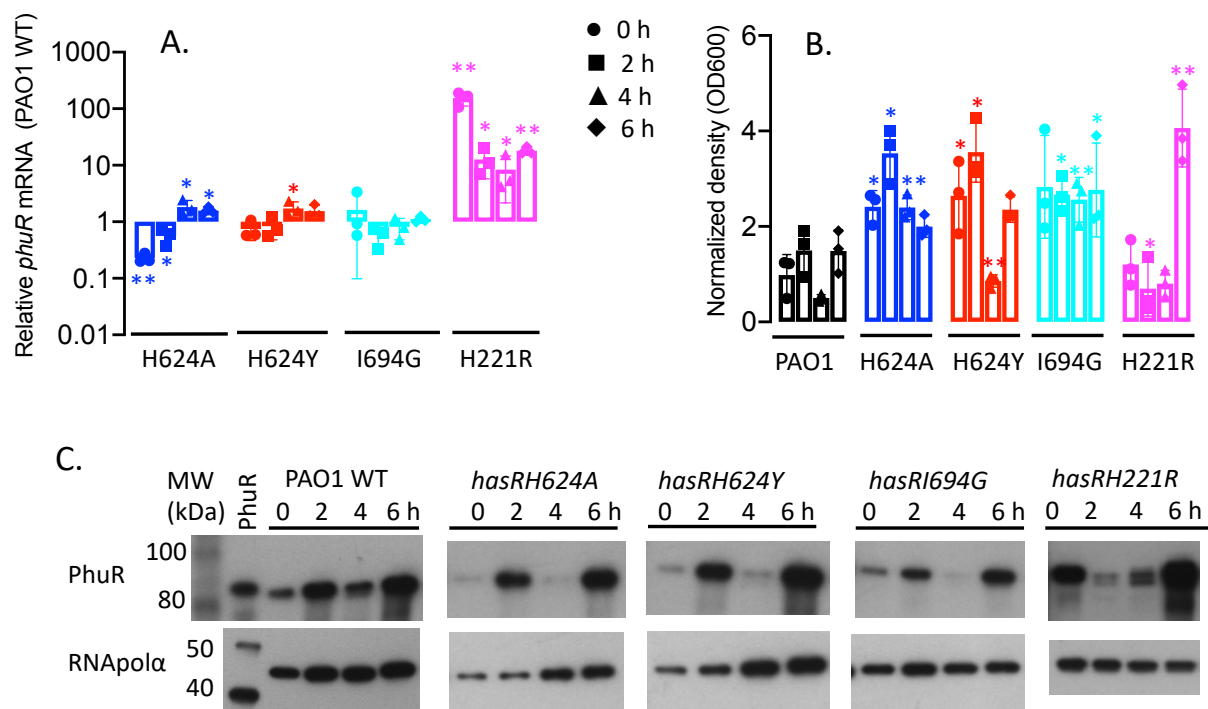

**Figure S2. Relative *phuR* mRNA and protein levels for the *hasR* allelic strains in heme supplemented conditions.** *A.* mRNA isolated at 0, 2, 4, and 6 h following growth in M9 minimal media supplemented with 1  $\mu$ M heme. mRNA values represent the mean from three biological experiments each performed in triplicate and normalized to PAO1 at the same timepoint. *Error bars* represent the standard deviation from three independent experiments performed in triplicate. The indicated *p* values were normalized to mRNA levels of PAO1 WT at the same timepoint, where \*, *p* < 0.05; \*\*, *p* < 0.005. *B.* Normalized density (*n* = 3) was performed on Western blots for three separate biological replicates. The indicated *p* values were normalized to PAO1 at the same timepoint where \*, *p* < 0.05; \*\*, *p* < 0.005. *C.* Representative Western blot of PAO1 WT and the *hasR* allelic strains. Total protein (5  $\mu$ g) was loaded in each well. The RNA polymerase  $\alpha$  subunit was used as a loading control. The RNA polymerase  $\alpha$  panel for PAO1 WT, *hasR624A*, and *hasRH221R* strain are the same as shown in Fig 8C as they represent the same set of biological samples from replicates collected in heme supplemented conditions.

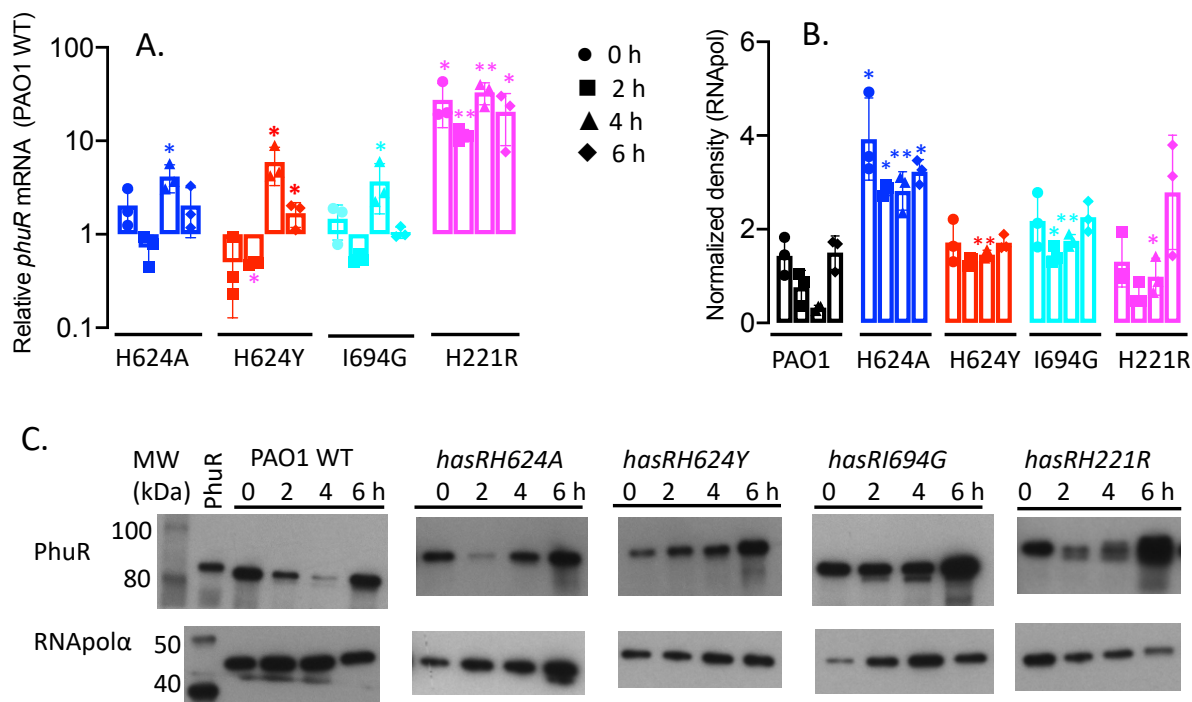

**Figure S3. Relative *phuR* mRNA and protein levels for the *hasR* allelic strains in holo-HasAp supplemented conditions.** *A.* mRNA isolated at 0, 2, 4, and 6 h following growth in M9 minimal media supplemented with 1  $\mu$ M holo-HasAp. mRNA values represent the mean from three biological experiments each performed in triplicate and normalized to PAO1 at the same timepoint. *Error bars* represent the standard deviation from three independent experiments performed in triplicate. The indicated *p* values were normalized to mRNA levels of PAO1 WT at the same timepoint, where \*, *p* < 0.05; \*\*, *p* < 0.005. *B.* Normalized density (*n* = 3) was performed on Western blots for three separate biological replicates. The indicated *p* values were normalized to PAO1 WT at the same timepoint where \*, *p* < 0.05; \*\*, *p* < 0.005. *C.* Representative Western blot of PAO1 WT and the *hasR* allelic strains. Total protein (5  $\mu$ g) was loaded in each well. The RNA polymerase  $\alpha$  subunit was used as a loading control. The RNA polymerase  $\alpha$  panels are the same as shown in Fig 10C as they represent the same set of biological samples from replicates collected in holo-HasAp supplemented conditions.

## REFERENCES

- de Lorenzo V & Timmis KN (1994) Analysis and construction of stable phenotypes in gram-negative bacteria with Tn5- and Tn10-derived minitransposons. *Methods Enzymol.* 235:386-405.
- Holloway BW (1955) Genetic recombination in *Pseudomonas aeruginosa*. *J. Gen. Microbiol.* 13(3):572-581.
- Hoang TT, Karkhoff-Schweizer RR, Kutchma AJ, & Schweizer HP (1998) A broad-host-range Flp-FRT recombination system for site-specific excision of chromosomally-located DNA sequences: application for isolation of unmarked *Pseudomonas aeruginosa* mutants. *Gene* 212(1):77-86.
- Rivera M & Walker FA (1995) Biosynthetic preparation of isotopically labeled heme. *Anal. Biochem.* 230(2):295-302.

5. Cenciarini C, Courtois S, Raoult D, & La Scola B (2008) Influence of long time storage in mineral water on RNA stability of *Pseudomonas aeruginosa* and *Escherichia coli* after heat inactivation. *PLoS One* 3(10):e3443.
